# Supplementary material for: Integrated Bioinformatics Analysis of Gene Expression Profiles for Potential Biomarker Identification Towards Early Therapeutic Intervention in Pancreatitis and Pancreatic Ductal Adenocarcinoma
Source: Research Square preprint supplement (doi:10.21203/rs.3.rs-879048/v1), 2021-09-15
Supplement: Supplementary file 1 [file 529001fe71df8ce33d36a886.xlsx]

## Sheet: Druggablity_DGIdb
Druggable gene category	Gene Count	Gene(s)
Druggable genome	14	COL6A3, COL1A1, FBLN1, COL8A1, THBS2, COL5A2, SPARC, COL3A1, THBS1, COL6A1, LUM, COL1A2, COL6A2, COL5A1
Cell surface	2	SPARC, THBS1
Clinically actionable	2	COL1A1, CDH11
Drug resistance	2	COL1A1, THBS1
External side of plasma membrane	1	THBS1
Protease inhibitor	1	COL6A3
Transcription factor	1	THBS1
